1  
2  
3  
4  
5  
6  
7  
8  
9  
10  
11  
12  
13  
14  
15  
16  
17  
18  
19  
20  
21  
22

## TITLE PAGE

### **Adapted protocol for *Saccharibacteria* co-cultivation: two new members join the club of Candidate Phyla radiation**

**Authors list:** Ahmad Ibrahim†<sup>1,2</sup>, Mohamad Maatouk†<sup>1,2</sup>, Andriamiharimamy Rajaonison<sup>1,2</sup>, Rita Zgheib<sup>1,3</sup>, Gabriel Haddad<sup>1,2</sup>, Jacques Bou-Khalil<sup>1,2</sup>, Didier Raoult<sup>1,2</sup>, Fadi Bittar\*<sup>1,2</sup>

**Affiliations :** <sup>1</sup> IHU Méditerranée Infection, Marseille, France ; <sup>2</sup> Aix-Marseille Univ., IRD, APHM, MEPHI, Marseille, France ; <sup>3</sup> Aix-Marseille Univ., IRD, APHM, SSA, VITROME, Marseille, France.

†: These authors share the status of first author.

\* **Corresponding author:** Fadi Bittar (email: [fadi.bittar@univ-amu.fr](mailto:fadi.bittar@univ-amu.fr)); ORCID: 0000-0003-4052-344X

**Keywords:** 6

**Word counts:** Abstract: 215

**Word counts:** Importance: 90

**Word counts:** Text: 5,432

**Number of figures:** 7

**Number of tables:** 0

**Number of supplementary data: Figures:** 3 **Tables:** 2

**Number of references:** 45

23 **ABSTRACT** The growing application of metagenomics to different ecological and  
24 microbiome niches in recent years has enhanced our knowledge of global microbial biodiversity.  
25 Among these abundant and widespread microbes, Candidate Phyla Radiation or CPR have been  
26 recognised as representing a large proportion of the microbial kingdom (> 26%). CPR are  
27 characterised by their obligate symbiotic or exo-parasitic activity with other microbial hosts,  
28 mainly bacteria. Currently, isolating CPR is still considered challenging for microbiologists. The  
29 idea of this study was to develop an adapted protocol for the co-culture of CPR with a suitable  
30 bacterial host. Based on various sputa, we tried to purify CPR (*Saccharibacteria* members) and  
31 to cultivate them with pure hosts. This protocol was monitored by real-time PCR quantification  
32 using a specific system for *Saccharibacteria* designed in this study, as well as by electron  
33 microscopy and sequencing. We succeeded in co-culturing and sequencing a complete genome  
34 of two new *Saccharibacteria* species: *Candidatus* *Minimicrobia naudis* and *Candidatus*  
35 *Minimicrobia vallesae*. In addition, we noticed a decrease in the Ct number of *Saccharibacteria*,  
36 and a significant multiplication through their physical association with *Schaalia odontolytica*  
37 strains in the enriched medium that we developed. This work may help bridge gaps in the  
38 genomic database by providing new CPR members and, in the future, their currently unknown  
39 characteristics may be revealed.

40 **IMPORTANCE** In this study, the first real-time PCR system has been developed. This  
41 technique is able to quantify specifically *Saccharibacteria* members in any sample of interest in  
42 order to investigate their prevalence. In addition, another easy, specific and sensitive protocol has  
43 been developed to maintain the viability of *Saccharibacteria* cells in an enriched medium with  
44 their bacterial host. The use of this protocol subsequently facilitates studying the phenotypic

45 characteristics of CPR and their physical interactions with bacterial species, as well as the  
46 sequencing of new genomes to improve the current database.

47 **KEYWORDS** Candidate phyla radiation, Saccharibacteria, Schaalia odontolytica, co-culture,  
48 Minimicrobia, protocol.

## 49 **INTRODUCTION**

50 Over the past two decades, the fast progress of molecular methods and the intensive use of both  
51 total and targeted metagenomics (mainly 16S ribosomal RNA gene) have led to the recognition  
52 of new microorganisms which were not previously reported (1, 2). These recently-described  
53 microbes, which now represent a huge and diverse proportion of the microbial domain, are  
54 generally microorganisms that have not yet been cultured (1). Following each major discovery,  
55 and according to a recent classification based on whole genome content analyses, CPR are  
56 beginning to appear as a new division in the rhizome of life, independent from classical bacteria  
57 (3, 4). Since these microbes are not present in a pure cultivable state, their phenotypic  
58 characteristics remain incompletely defined (5). All known data are simply extracted from  
59 predictions based on bioinformatics analyses, which encourages microbiologists to culture them  
60 (1, 5). However, many difficulties limit their culture, such as slow growth/division, the need for  
61 specific metabolites in the final medium, and the growth inhibition by other dominant  
62 microorganisms or, inversely, the need for an obligatory association with another microorganism  
63 serving as a host in order to flourish (1, 2, 6, 7).

64 Recent studies on microbial diversity in human and environmental samples based on whole  
65 metagenomics analyses has made it possible to identify a new group of microorganisms that are  
66 not well recognised by the 16S rRNA gene, and which continue to be resistant to culture: the

67 Candidate Phyla Radiation (also named CPR) (8). This group is comprised of more than 73 new  
68 Phyla, and represents a huge proportion (more than 26%) of the bacterial domain (2, 9, 10).  
69 Although CPR members present high inter-individual heterogeneity in genomic sequences, they  
70 do have certain common characteristics; they are morphologically small (100 to 300 nm), have a  
71 reduced genome size (usually less than 1 Mgb) (1), a high percentage of hypothetical proteins  
72 (11), and a single copy of 16S rRNA (8). Furthermore, CPR have a developed cell membrane  
73 close to that of Gram-positive bacteria (11), as well as limited and unknown/undetailed  
74 biosynthetic and metabolic capacities (12). In addition, they are enriched by proteins involved in  
75 cell-cell interactions, such as the presence of Pili belonging to the type IV secretion system (13).  
76 These proteins allow CPR members to be attached to their respective hosts, characterising their  
77 lifestyle, which appears to be either an exosymbiotic or exo-parasitic relationship (6, 7, 13).  
78 Recently, it has been suggested that CPR co-evolved with bacteria (and not from bacteria), based  
79 on the distribution and diversity of their protein families (4, 11). Recent studies have shown that  
80 CPR are unable to synthesise nucleotides *de novo* and that they retain only the genes essential for  
81 their survival (11, 14). In fact, CPR seem to behave in a different, particular way (a non-  
82 traditional biological process), with their own ribosomal structures, and introns are present in  
83 their transfer RNA (tRNA) and 16S rRNA sequences (12). Analysis of the genomes available in  
84 the NCBI (National Centre for Biotechnology Information) database has led to the prediction of  
85 certain phenotypic characteristics unique to this group of microbes. These characteristics include  
86 their natural resistance to bacteriophage, despite the absence of the CRISPR viral defence in their  
87 genomes, which is due to the lack of viral receptors in their cell membrane (15), and the presence  
88 of different proteins involved in Quorum Sensing phenomena and cell-cell communication (16).  
89 None of these characteristics, however, have yet been confirmed *in vitro*.

90 *Saccharibacteria* or TM7, is the most studied CPR phylum and was named due to its sugar  
91 metabolism (17). Sequences belonging to this phylum have been systematically detected in  
92 several environmental and ecological samples, including soil, freshwater lakes, dolphin teeth,  
93 and termite guts (18, 19). In addition, metagenomics studies have shown that members of TM7  
94 are also present in the human microbiome, including the intestinal, oral, urinary, cutaneous,  
95 blood and vaginal microbiota (11, 17, 20–22). Various studies have shown that *Saccharibacteria*  
96 members are associated with various human mucosal-related diseases, such as vaginosis,  
97 periodontitis and bowel disease (6, 20, 23).

98 To date, a few members of *Saccharibacteria* have been co-cultured with different Gram positive  
99 and negative bacterial hosts, most often *Schaalia odontolytica*, *Actinomyces* spp.,  
100 *Cellulosimicrobium cellulans*, *Lachnoanaerobaculum saburreum*, *Arachnia propionica* and  
101 *Leptotrichia* spp. (1, 2, 6, 24). Based on streptomycin resistance prediction, TM7x HMT-952  
102 (also known as *Candidatus Nanosynbacter lyticus*) was the first TM7 strain to be cultivated and  
103 sequenced with its bacterial host in 2015 (6).

104 In order to expand our knowledge about this phylum, and to improve its phenotypic  
105 characterisation, culture is essential. Our aim in this study was to develop an easy and  
106 reproducible protocol for purifying strains belonging to *Saccharibacteria* species recovered from  
107 a human oral sample and to co-cultivate them with a mixture of *Schaalia odontolytica* strains.

## 108 **RESULTS**

### 109 1- **Specificity of the real time PCR system:**

110 The specificity of our designated qPCR system was confirmed using the collection of DNAs  
111 mentioned above. All bacterial and fungal DNA samples were negative, as well as the 25 stool

112 samples which were negative on 580-F–1177R specific primers for *Saccharibacteria*. For greater  
113 accuracy, we tested 25 different sputum samples. All samples were positive by standard PCR and  
114 by our designated real-time PCR, with Ct values ranging between 17.02 and 23.57. In addition,  
115 the BLASTn analysis of the amplicons sequenced by Sanger shows that they all matched with  
116 different *Saccharibacteria* 23S rRNA genes. This system can amplify 126 base pair fragments of  
117 the 23S rRNA gene that serves as a specific marker for all *Saccharibacteria* spp.

## 118 2- **Isolation and co-culture of *Saccharibacteria* species and quantification test:**

119 After checking that the two samples studied here were positive by specific real-time PCR for  
120 *Saccharibacteria* (similar Ct values were obtained for the two original samples tested (18.04 and  
121 17.61 respectively), a seven-day period of enrichment, in TSB-BHI with hemin and vitamin K  
122 was initiated. Given that CPR members have a physically reduced corpuscle, they can pass  
123 through a 0.45-0.22 filter, allowing for efficient isolation of CPR cells for co-culturing and  
124 sequencing. In addition, we managed to concentrate *Saccharibacteria* cells in high quantities by  
125 ultracentrifugation (Figure 1). Most of the reads obtained by MiSeq-Illumina and GridION  
126 sequencing corresponded to *Saccharibacteria* sequences. After mixing the pellet with the 6 *S.*  
127 *odontolytica* strains, and due to the protocol steps, the Ct value of each sample was respectively  
128 23.02 and 23.78). Co-culturing was then monitored by qPCR. In both samples, we noticed a  
129 significant decrease in Ct values after 48 hours of culture (21.07 and 21.24 respectively) (Figure  
130 2). However, after this step and until the eighth day of culture, no significant variations in Ct  
131 values were observed. Ct values remained almost stable. The presence of *Saccharibacteria* cells  
132 at each step was also confirmed by electron microscopy (Hitachi TM4000 Plus and SU5000)  
133 following the presence of exosymbiotic coccus attached to several bacterial forms (Figure 3).

134 To ensure that the nutrients were continuously renewed, a passage was performed on the second  
135 and sixth day of culture; 200 µl of the enrichment broth (containing *Saccharibacteria* cells and *S.*  
136 *odontolytica* strains) was mixed with 2.4 ml of initial medium supplemented with pig gastric  
137 mucin and incubated at 37°C in anaerobic conditions. Due to the dilution factor (200 µl in 2.4  
138 ml), the Ct values were higher on day 0 of the passage (day 2 of the initial co-culture) in both  
139 samples (25.07 and 24.87 respectively) (Figure 2). We obtained comparable results: after only 48  
140 hours of incubation, Ct values were also lower (23.61 for the first sample and 23.9 for the  
141 second). Conversely, we observed no multiplication of CPR following the passage made from  
142 the sixth day of the initial enrichment (Figure 2). This test confirms the viability of  
143 *Saccharibacteria* cells attached to *S. odontolytica* and the success of CPR co-culture using this  
144 protocol.

145 However, co-culturing of the pellets of a third sample (starting Ct= 18.92) with the three  
146 *Streptomyces* strains did not render similar results. The Ct values remained stable afterwards for  
147 eight days. Even the two passages did not increase the Ct values in aerobic and anaerobic  
148 conditions. Thus, the *Saccharibacteria* cells did not multiply following their association with this  
149 new bacterial host (Figure 2).

150 Finally, after 48 hours of co-culture, between 50 and 100 µl of each enrichment broth was  
151 deposited on COS medium, SHI supplemented with blood and mucin, and BHI supplemented  
152 with 10% sheep blood. Each anaerobically isolated colony was tested by qPCR. Our qPCR  
153 system could not identify positive colonies. For greater precision, a standard PCR test was  
154 performed, and all colonies were negative for *Saccharibacteria*. The MALDI-TOF-MS (Matrix-  
155 Assisted Laser Desorption Ionisation Time-of-Flight Mass Spectrometry) test identified the most  
156 isolated colonies as *S. odontolytica* (or *A. odontolyticus*) / *Streptococcus oralis* with a high score

157 (>1.9). This score indicates the absence of foreign proteins (such as *Saccharibacteria* proteins) in  
158 each colony that can affect the spectra related to each known bacteria.

### 159 3- ***Saccharibacteria* cell imaging by electron microscopy:**

160 Each initial sample was observed using electron microscopy (Hitachi TM4000 Plus and  
161 SU5000). We noticed a strong presence of biofilm, and a lot of coccus microbes attached to the  
162 external surface of several bacterial forms (bacilli and cocci). The size of these particles ranged  
163 from 100 and 400 nm, which corresponds to the described size of CPR members (Figure 3).

164 However, following the filtration/centrifugation of the initial enrichment step, we were able to  
165 observe single and detached cocci forms, with no association with any bacterial host (Figure 3).  
166 The size of these particles is similar to those observed in the original samples, and much smaller  
167 than the known cocci bacteria (*Staphylococcus* spp., *Streptococcus* spp. for example). These  
168 observations, along with the molecular results, confirm that *Saccharibacteria* cells were well  
169 separated from their bacterial hosts (Figure 3).

170 Finally, a microscopic slide for each host strain used was viewed using the two electron  
171 microscopes; we were unable to detect any form with a size similar to that of CPR cells.

172 However, round-shape cells (1 to 2/ bacterial cell) appeared on the surface of these strains on the  
173 second day of their co-culture with the “purified” *Saccharibacteria* spp. (Figure 3), and single  
174 *Saccharibacteria* and *S. odontolytica* cells continued to be observed. Hence, a physical  
175 association between purified *Saccharibacteria* and its host appeared. There were, therefore,  
176 bacteria that did not harbour CPR, and other bacteria that were carriers of a maximum of one or  
177 two *Saccharibacteria*. The observations on day 4 and day 6 showed the same results.

### 178 4- **Genomic sequencing and description:**



179 For each DNA sample, the total of Illumina and Nanopore reads were mapped against the  
180 *Saccharibacteria* reference genome (TM7x) using the CLC genomics 7 server. The filtration  
181 protocol, combined with the pre-treatment extraction allowed us to cover the entire TM7x  
182 genome (100%) in each DNA sample. Using long range PCR, we obtained two complete  
183 genomes representing two new *Saccharibacteria* species. The first genome (named *Candidatus*  
184 *Minimicrobia naudis*) has a length of 708,351 bp with 43.9% G+C content. It has 1,324 protein  
185 coding genes that include 792 hypothetical proteins (59.81%). Similarly, the second sequenced  
186 genome (*Candidatus* *Minimicrobia vallesae*) has a length of 706,973 bp and a 43.7% of G+C  
187 content. 48.97% of its protein coding genes (n= 1,017) correspond to hypothetical proteins  
188 (Supplementary data: Table S1). In addition, according to the proteomic analysis, 719 and 618  
189 protein-coding genes of *Candidatus* *M. naudis* and *Candidatus* *M. vallesae*, respectively, were  
190 assigned to COGs categories (Supplementary data: Figure S1, Table S2). We did not detect any  
191 proteins belonging to the following COGs categories: B, Q, W, X, Y & Z. A graphic circular  
192 map for each genome is presented in Supplementary data: Figure S2. Genomic comparison  
193 between our two genomes and TM7x (as a reference genome) using Easyfig v-2.2.5 is presented  
194 in Figure 4. In addition, recent studies have shown the presence of introns in the tRNA of CPR  
195 (12). Here, we identified one tRNA/genome which contains intronic sequence: Gly CCC for  
196 *Candidatus* *M. naudis* and Thr TGT for *Candidatus* *M. vallesae* (Figure 5). We did not find any  
197 NRPS/PKS clusters nor IS sequences in either genome. With regard to antimicrobial resistance  
198 screening, *Candidatus* *M. naudis* was resistant to mupirocin, glycopeptide, tetracycline and  
199 oxazolidinone. Likewise, we found resistance genes for glycopeptide, tetracycline, oxazolidinone  
200 and MLS in the *Candidatus* *M. vallesae* genome (25). Finally, we also found type II, IV and VI  
201 Pili secretion systems in both genomes, and type I Pili in *Candidatus* *M. vallesae* only.

202 For taxogenomic classification, the phylogenetic trees based on 16S rRNA, and the whole  
203 genome sequences show that our two new *Minimicrobia* species belong to the superphylum  
204 *Saccharibacteria*, with all the CPR tested phyla (Figure 6). In addition, the analyses of 16S  
205 ribosomal RNA, as previously described, show that our two new species belong to the clade G1  
206 of *Saccharibacteria* oral species (26, 27). The maximum OrthoANI value was 84.2412% for  
207 *Candidatus M. naudis* with TM7 - ASM569739v1, 84.0275% for *Candidatus M. vallesae* with  
208 TM7- ASM80362v1 and 90.7707% between them (Supplementary data: Figure S3). Likewise,  
209 digital DNA-DNA hybridisation showed that our described genomes had the highest values  
210 (26.01% for *Candidatus M. naudis*, 25.3% for *Candidatus M. vallesae*) with *Candidatus*  
211 *Saccharibacteria* bacterium oral taxon 955 - ASM1020192v1 and TM7- ASM569739v1,  
212 respectively. The percentage between them was 41.7% (39.2–44.2 confidence interval).  
213 According to these values, we defined *Candidatus M. naudis* and *Candidatus M. vallesae* as two  
214 new CPR species belonging to the *Saccharibacteria* phylum.

215 According to the taxonomic affiliation of each *Saccharibacteria* sequence, their origins were  
216 determined. The evolutionary history of each genome is presented here based on all genomic  
217 sequences belonging to the repertoire of coding genes. We obtained a particular mosaicism for  
218 both *Candidatus M. naudis* and *Candidatus M. vallesae* (4), similar to one another and  
219 comparable to that of the reference genome (Figure 7).

220 For each genome, we found a prevalence of sequences of bacterial and CPR origins (45.6% and  
221 42.6%, respectively, for *Candidatus M. naudis* and 48.4% and 45.4% for *Candidatus M.*  
222 *vallesae*, respectively). Among the sequences of CPR origin, a large percentage is unique to the  
223 phylum *Saccharibacteria* (an average of 31% in each genome). However, we also detected some

224 eukaryotic and archaean sequences in each genome (0.32% / 0.24% respectively, for *Candidatus*  
225 *M. naudis* and 0.16% / 0.3% for *Candidatus M. vallesae*, respectively) (Figure 7).

## 226 **DISCUSSION**

227 The oral microbiota is known as the most complex human microbiota. It has been estimated that  
228 it may contain more than 775 microbial species (22). In addition, following the initial inclusion  
229 of CPR in the tree of life, different metagenomics studies have shown that the *Saccharibacteria*  
230 phylum is very abundant in humans and, more precisely, in the oral cavity (17). Therefore, this  
231 co-culture protocol was mainly tested on sputum samples.

232 The quantification and viability of *Saccharibacteria* has been tested by standard PCR in a  
233 number of studies (1, 6, 24, 28). Different sets of primers targeting the 16S rRNA have been  
234 identified as universal for this phylum (28). According to these results, *Saccharibacteria* was  
235 considered viable if the PCR was still positive after five passages (1). This method increases the  
236 risk of false positive results by amplifying DNA for dead microorganisms and/or mis-  
237 quantification. Here, we developed a real time qPCR system which was, for the first time,  
238 specific for *Saccharibacteria* phylum, enabling us to detect and quantify this phylum in any  
239 interesting samples. In addition, this specificity was re-confirmed by selecting all additional  
240 complete genomes available in the NCBI database between 1 December 2019 and 1 June 2021.  
241 This system was able to amplify 34/35 tested genomes (specificity = 97.12%). Following our  
242 results, very low Ct values were obtained from fresh sputa, confirming their abundance in the  
243 oral microbiota (17). Secondly, *Saccharibacteria* members have not yet been cultivated in pure  
244 culture. Their identification on agar media or by MALDI-TOF MS is currently impossible. The  
245 use of this system, followed by metagenomics analysis, therefore enable this phylum to be

246 screened in any sample, and in the future may lead to greater precision regarding their prevalence  
247 in humans and in environmental samples.

248 In this study, in line with several others (1, 2, 6), we confirmed that *Saccharibacteria* cells (CPR  
249 cells in general) can detach themselves from their natural host bacteria following continuous  
250 agitation. They can then adapt with another host to multiply (1). Following a co-culture of *S.*  
251 *odontolytica* strains with purified *Saccharibacteria* cells, Ct values decreased after two days,  
252 which explains their persistence and viability in liquid media. However, Ct values remained  
253 stable between days 2 and 8. It could, therefore, be suggested that the nutrients needed by CPR  
254 cells have already been consumed and/or the metabolic and nutrient transport between the host  
255 and the guest has entered a standby stage, hence we were unable to detect further multiplication.  
256 Nutritional supplementation of this complex (renewal of enrichment passage at day 2) restored  
257 these activities. Two criteria should therefore be considered to keep CPR at the multiplying  
258 stage: having a suitable host and a well-renewed enriched medium. In addition, and as suggested  
259 by He *et al.*, CPR accompanies *Schaalia* spp. in stable long-term infections due to the adaptation  
260 and rapid evolution of its host (6). Moreover, it is thought that, on day 6 of culture, the CPR were  
261 dead, and only the DNA of the dead cells was amplified. Therefore, we failed to decrease the Ct  
262 value after a passage from the sixth day of initial culture. The protocol optimised in this study  
263 therefore guarantees highly protection and easy purification of the CPR and ensures very  
264 sensitive monitoring of their viability by electron microscopy and qPCR. It also provided the  
265 *Saccharibacteria* with an enriched nutrient complex, especially with the addition of pig gastric  
266 mucin during the host infection stage. This protocol could be used to search for other bacterial  
267 hosts not yet described for CPR.

268 It is known that the physical size of the CPR is between 100 and 300 nm, so we limited the  
269 filtration here to 0.45  $\mu\text{m}$ , to avoid losing a quantity of CPR between 0.22  $\mu\text{m}$  and 0.3  $\mu\text{m}$ .  
270 Therefore, our metagenomics analyses of the filtrate showed some contaminations of sequences  
271 belonging to the *Streptococcus* and *Veillonella* species which passed through the filters (29).  
272 However, most of the reads still correspond to the phylum TM7 - *Saccharibacteria*.  
273 Furthermore, we were unable to isolate a positive colony as demonstrated by our real-time PCR  
274 system. Following a deposit of the starting sample and the filtrate mixed with *Schaalia* spp., all  
275 colonies were negative in real time PCR and electron microscopy. A recent study showed that  
276 the use of reverse genomics methods was successful in producing *Saccharibacteria* positive  
277 colonies (24). This method is based on a target antibody that only picks up *Saccharibacteria* with  
278 their hosts (24). In our assay, other microorganisms were able to pass through the 0.45  $\mu\text{m}$   
279 filtrate. We suggest that the requirement of *Saccharibacteria*, and/or their fragility by the  
280 presence of other microorganisms in the filtrate (*Streptococcus oralis* for example), prevented  
281 their multiplication on a solid medium, even though several enriched media were tried (COS,  
282 supplemented BHI and SHI agar). It would, therefore, be interesting to find universal epitopes,  
283 common to all known *Saccharibacteria* rather than based on one or two genomes, to facilitate  
284 their solid culture and sorting them using flow cytometry.

285 It is known that *Saccharibacteria* members interact with *S. odontolytica* to multiply in an exo-  
286 symbiotic (or exo-parasitic) relationship, in stable long-term infections between these two  
287 microorganisms. Furthermore, different studies have suggested that *Saccharibacteria* spp. can  
288 adapt with other bacteria, such as *Arachinia* spp. for example (1). Here, the infection of  
289 *Streptomyces* spp. by purified *Saccharibacteria* cells was not successful in terms of their  
290 multiplication, indicating that the association between these microorganisms is not appropriate to

291 a nutrient transfer from the host bacterium to the CPR cells. Hence, *Streptomyces* cannot be  
292 considered as one of the hosts of identified *Saccharibacteria* species. Finally, this protocol  
293 extends the described diversity of CPR to date. It enabled us to recover two new species  
294 belonging to the phylum *Saccharibacteria*. Both species are unique, and they are of similar size  
295 to those described in the literature, but with very divergent sequences (maximum OrthoANI and  
296 DDH values are very low). In addition, we found a tRNA with intronic sequences in each  
297 genome, which has recently been described in CPR genomes (12).

298 Concerning their origin, the presence of archaeal/eukaryotic sequences suggests the presence of  
299 an interaction between these microorganisms in their shared niche (4, 30, 31). The mosaic  
300 structure of CPR in general gives them a unique characteristic, comparable to one another and  
301 different from other microbial domains (4).

## 302 **MATERIALS AND METHODS**

### 303 **1- Sample collection and ethics statement:**

304 Twenty-eight sputum samples were collected at La Timone University Hospital (AP-HM,  
305 Assistance Publique-Hôpitaux Marseille) from routine laboratory diagnostics. Research analyses  
306 were only performed on surplus samples, once laboratory diagnostic procedures had been  
307 initiated. The patients were informed that their samples may be used for research purposes and  
308 retained the right to oppose to this use. Given that this study did not involve specific collection of  
309 samples or use medical/personal data from patients, and according to French law (the Jardé's  
310 law), neither institutional ethical approval nor individual patient consent was required for this  
311 non-invasive study (Loi no 2012–300 du 5 mars 2012 and Décret no 2016–1537 du 16 novembre  
312 2016 published in the ‘Journal Officiel de la République Française’).

313 Each 2 ml sample was diluted in 1 ml of transport medium composed of 0.1g MgCl<sub>2</sub>, 0.2 g  
314 KH<sub>2</sub>PO<sub>4</sub>, 1.15 g NaCl, 1g Na<sub>2</sub>HP<sub>4</sub>, 1g ascorbic acid, 1g uric acid and 1g Glutathione per 1 litre of  
315 deionised water; pH= 7.5). All tested samples were stored in anaerobic conditions.

## 316 **2- Isolation of *Saccharibacteria* spp. and culture conditions:**

317 In a hemoculture tube, we diluted 1 ml of each sputum sample in 39 ml enriched broth: (per  
318 1,000 mL TSB (Tryptic soy broth): 37g BHI (Brain Heart Infusion), 10g yeast extract, 10 mg  
319 Hemin and 50 µl Vitamin K pH final = 7, (BioMérieux, Marcy-l'Etoile, France) at 37 °C and in  
320 an atmosphere of 85% N<sub>2</sub>, 10% CO<sub>2</sub> and 5% H<sub>2</sub>. Each culture was performed in anaerobic  
321 chamber (Coy), for seven days with agitation (300 rpm) to separate the *Saccharibacteria* cells  
322 present from their bacterial hosts. After seven days of enrichment and agitation, the broth was  
323 filtered at 0.8 µm and 0.45 µm respectively, to eliminate big particles and associated cultured  
324 bacteria. For greater cell concentration, an ultracentrifugation of 100.000 x g was then performed  
325 for two hours at 4°C. The pellet (which was sometimes invisible) was resuspended in 2.5 ml of  
326 the enrichment broth mentioned above, supplemented with 2.5g/l of pig gastric mucin.

327 In addition, we prepared a 1 McFarland solution of six *Schaalia odontolytica* strains (previously  
328 known as *Actinomyces odotonlyticus*), isolated from a human oral cavity, in physiological water.  
329 For each resuspended pellet, 200 µl was used for molecular biology analyses and the remaining  
330 quantity was cultured with 0.1 ml of *Schaalia odontolytica* strains solution for seven days in a  
331 Hungate tube with no agitation, under the same anaerobic conditions described above. After 48  
332 hours of culture, 50 to 100 µl of each enrichment broth was deposited on COS agar, SHI and  
333 BHI agar (BioMérieux, Marcy-l'Etoile, France) supplemented by 10% sheep blood and 2.5 pig  
334 gastric mucin each in anaerobic conditions (Figure 1). The same culture protocol described  
335 above was also tested on other samples by mixing the filtrate with 1 McFarland of three

336 *Streptomyces* spp. strains (*Streptomyces cattleya* DSM 46488, *Streptomyces massiliensis*,  
337 *Streptomyces rochei*), isolated from the human gut, separately in aerobic and anaerobic  
338 conditions (Figure 1).

### 339 **3- *Saccharibacteria* viability testing:**

340 To evaluate *Saccharibacteria* co-culture, we designated a real time PCR system for  
341 quantification. To do so, we selected all *Saccharibacteria* complete genomes available in the  
342 NCBI on 1 December 2020. Based on the conserved ribosomal genes, a multiple alignment of  
343 23S ribosomal was performed to determine the conserved zones. We consequently selected  
344 SacchariF: GGCTTATAGCGCCCAATAG as a forward primer, SacchariR:  
345 CGGATATAAACCGAACTGTC as a reverse primer, and SacchariP: 6-FAM-  
346 CATAGACGGCGCTGTTTGGCAC-TAMRA as a TaqMan probe.

347 The specificity of this system was confirmed *in silico* by BLASTn against the nr database, and *in*  
348 *vitro* against a variety of 50 bacterial species, 70 *Candida* strains (32) and 25 stool samples  
349 which had previously tested negative with the specific *Saccharibacteria* standard PCR (580-F –  
350 1177-R) (33).

351 To improve the extraction of *Saccharibacteria* DNA, several pre-treatments were performed on  
352 each tested sample and culture condition. For deglycosylation, each 180 µl  
353 sample/*Saccharibacteria* co-culture was treated with Endo Hf Kit P0703L (New England  
354 Biolabs, Evry, France): 3 µl of each reagent was added to the sample and incubated for one hour  
355 at room temperature, then one hour at 37°C. We then added 10 µl lysozyme for two hours, 10 µl  
356 proteinase K for 12 hours at 56°C, followed by one-minute disruption with glass powder using  
357 Fast-Prep. We used the EZ1 biorobot (Qiagen BioRobot EZ1-, Tokyo, Japan) for the automated



358 extraction, using the EZ1 DNA tissue kit (EZ1 DNA, Qiagen, Hilden, Germany) and the  
359 bacterial protocol card. Each sample of DNA extracted was diluted in 50 µl solution. A PCR  
360 quantification test was then performed on each sample before culture, and every 48 hours after  
361 infecting *Schaalia odontolytica* strains / *Streptomyces* spp. strains with purified *Saccharibacteria*  
362 cells. For this purpose, we used the CFX-96 device connected to TM-BioRad using TaqMan  
363 technology (Figure 1). The qPCR reactions were carried out according to the following protocol:  
364 two minutes of incubation at 50°C, 15 minutes of activation at 95°C, followed by 40 cycles of  
365 five seconds at 95°C and 30 seconds at 60°C for DNA amplification, then a final step at 45°C for  
366 30 seconds. We prepared each qPCR mixture in 20 µl total volume containing 10 µl of  
367 QuantiTect Primers Assays, 2 µl of sterile water, 1 µl of each primer, 1 µl of probe, and 5 µl of  
368 each DNA (32). In addition, to confirm the qPCR specificity, each amplicon was sequenced  
369 using the Sanger method and analysed by BLASTn against the nr database.

#### 370 **4- Bacterial and CPR imaging:**

371 All specimens or samples were fixed in 2.5% glutaraldehyde solution and were deposited by  
372 cyto-centrifugation on cytospin slides, followed by staining with a 1% PTA (Phosphotungstic  
373 acid) aqueous solution (pH =7) for three minutes. All samples were then sputtered with a 10 nm  
374 thick Platinum layer to reduce charging of the imaged samples.

375 For image acquisition, we first used Hitachi's TM4000 Plus tabletop SEM, approximately 60 cm  
376 in height and 33 cm wide to evaluate bacterial structure. We used the Backscatter Electron (BSE)  
377 as a detector. The voltage of acceleration was 10 kV and magnifications varied from 250 X to  
378 7,000 X. Using the same accelerating voltage, we then used Hitachi's SU5000 SEM for the  
379 higher resolution and magnifications. Magnifications varied from 5,000 X to 15,000 X. The  
380 evacuation time after loading specimens into the SEM Chamber was less than two minutes. All

381 co-cultures of samples / *Saccharibacteria* cells were acquired using the same acquisition settings  
382 regarding magnification, intensity and voltage mode. Here, each microbial form presenting a  
383 cocci shape (coccus), and a physical size between 100 and 400 nm, outside or attached to a  
384 bacterium was considered as a CPR cell.

#### 385 **5- Next-generation sequencing:**

386 Extracted DNA was sequenced using two different methods, firstly on the MiSeq (Illumina Inc,  
387 San Diego, CA, USA) using the Nextra XT DNA sample prep kit (Illumina), with the paired end  
388 strategy. The tagmentation step fragmented and tagged each extracted DNA to prepare the  
389 paired-end library. A limited PCR amplification (12 cycles) was then performed to complete the  
390 tag adapters and to introduce dual-index barcodes. DNA was then purified on AMPure XP beads  
391 (Beckman Coulter Inc, Fullerton, CA, USA). In addition, according to the Nextera XT protocol  
392 (Illumina), all libraries were normalised on specific beads. We then pooled all libraries into one  
393 library for DNA sequencing on MiSeq. The pooled single strand library was loaded onto the  
394 reagent cartridge and then onto the instrument along with the flow cell. Automated cluster  
395 generation and paired end sequencing with dual index reads were performed in a single 39-hour  
396 run in 2x250-bp.

397 The Oxford Nanopore method was then performed on 1D genomic DNA sequencing for the  
398 GridION device using the SQK-LSK109 kit. A library was constructed from 1 µg genomic DNA  
399 without fragmentation and end repair. Adapters were ligated to both ends of the genomic DNA.  
400 After purification on AMPure XP beads (Beckman Coulter Inc, Fullerton, CA, USA), the library  
401 was quantified by a Qubit assay with the high sensitivity kit (Life technologies, Carlsbad, CA,  
402 USA). We detected active pores for sequencing and the WIMP workflow was chosen for live  
403 bioinformatic analyses.

404       **6- Genomic description:**

405       For each sample/purified *Saccharibacteria* DNA sequence, the quality of each Illumina and  
406       Oxford Nanopore read was checked by FastQC, and trimmed using trimmomatic version 0.36.6.  
407       We merged all the reads that corresponded to a given sample (this protocol was applied to one  
408       sputum, and then confirmed on a second). Each group of reads was mapped against the reference  
409       *Saccharibacteria* genome (*Candidatus* Nanosynbacter lyticus, available on NCBI under  
410       accession number: ASM80362v1) using CLC Genomics Workbench v.7. We used the default  
411       parameters except for the length fraction (reduced to 0.3) and the similarity fraction (reduced to  
412       0.5). Mapped reads were assembled using SPAdes software, version 3.13.0 (34) using the default  
413       options. For this step, we only kept contigs with a minimum size of 400 bp. Each contig was then  
414       analysed by BLASTn against the nr database and we only kept contigs which matched with  
415       sequences corresponding to *Saccharibacteria* spp. All selected fasta sequences were then  
416       mapped against TM7x - ASM80362v1, using the same criteria mentioned above to generate the  
417       sequenced *Saccharibacteria* genome, with no contamination by any bacterial/eukaryotic  
418       sequences.

419       To complete our sequenced genomes (to fill in the gaps) we designed primers around each gap to  
420       perform long range PCR. Each PCR product (amplicon) was then sequenced using the Oxford  
421       Nanopore method and mapped against the contig to link them. These genomes were deposited in  
422       the GenBank as complete genomes under accession numbers CP076459 and CP076460. Then,  
423       coding and non-coding genes, hypothetical proteins, CDS, and rRNA were predicted using  
424       Prokka (35). tRNA genes were predicted by tRNA SCAN SE, using the default option and all  
425       available sequences sources (36). Proteomes were predicted with BLASTp (e-value of 0.001,  
426       minimum coverage and identity of 70% and 30% respectively) against the cluster of orthologous

427 groups database (37). Antibiotic resistance genes were then predicted by Abricate (mass  
428 screening of contigs for antimicrobial and virulence genes) using ARG-ANNOT (antimicrobial  
429 resistance gene annotation) and ResFinder as databases (38). Similarly, we looked for the  
430 presence of NRPS-PKS using BLASTp against the NRPPUR database (39). In addition, in order  
431 to detect lateral sequence transfers between our species and their host (presence of  
432 transposon/integron), a screening for IS sequences was performed by BLASTn and BLASTp  
433 against the ISfinder online tool (40). *Saccharibacteria* members are known to have protein  
434 secretion systems (Pili) which attach onto the external membrane of their host. For this purpose,  
435 we screened our assembled genomes against the MacSyDB/TXSSdb online database (41) to  
436 detect all proteins secretion systems which were presented. An additional genomic comparison  
437 between our genomes and TM7x reference genome was then performed using Easyfig v.2.2.5  
438 (42).

439 To determine the mosaicism and evolutionary history of each genome, we constructed a  
440 representative rhizome that showed the genetic exchange between our sequenced  
441 *Saccharibacteria* spp. and the other organisms (4). For this purpose, a BLASTp for each coding  
442 gene was performed against the NCBI protein database. Any protein which did not match with  
443 any sequence was considered as ORFans. The remaining best HITs were selected based on the  
444 following criteria: minimum identity and coverage of 20% and 30% respectively, and maximum  
445 e-value of 0.001, as previously described (4, 43). Rhizome representations were then constructed  
446 using the circos software (44).

447 For taxonomic characterisation, we selected for comparison all CPR complete genomes which  
448 were available on the NCBI at 1 June 2020 (n=81). A multiple alignment of 16S rRNA  
449 sequences was performed using MUSCLE software, and curated alignments were then used for

450 the construction of a phylogenetic tree using the maximum likelihood (ML) method, with 1,000  
451 bootstrap replicates, using nearest-neighbour-interchange (NNI) with the Jones-Taylor-Thornton  
452 (JTT) model. Tree were constructed using MEGA-X software. In addition, the degree of  
453 genomic similarity between all selected genomes was estimated using OrthoANI software. We  
454 also used the Genome-to-Genome Distance Calculator Web Service to calculate the digital  
455 DNA-DNA hybridisation (dDDH) value with confidence intervals according to recommended  
456 parameters, as a previously described (45).

#### 457 **DATA AVAILABILITY**

458 *Candidatus* Minimicrobia naudis & *Candidatus* Minimicrobia vallesae genomes were deposited  
459 in the NCBI-GenBank under accession numbers CP076459 and CP076460, respectively.

#### 460 **ACKNOWLEDGMENTS**

461 We thank Ludivine Brechard, Olivia Ardizzoni, Vincent Bossi, and Madeleine Carrara (Institut  
462 Hospitalo-Universitaire Méditerranée-Infection, Marseille 13385, France) for their technical help  
463 in sequencing. We would like to also thank Dr Linda Hadjadj and Dr Mouna Hamel for their  
464 committed assistance in the laboratory. We thank the Hitachi team of Japan (Hitachi High-  
465 Technologies Corporation, Science & Medical Systems Business Group 24-14, Nishi-shimbashi  
466 1-chome, Minato-ku, Tokyo 105-8717 Japan) for the collaborative study conducted together with  
467 IHU Méditerranée Infection, and for the installation of the TM4000 Plus and SU5000  
468 microscopes at the IHU Méditerranée Infection facility.

469 F.B., D.R., and A.I. designed the study. A.I. and M.M. wrote the manuscript. F.B., D.R. and  
470 J.B.K revised the manuscript. A.I. and M.M. performed the microbiological analyses. A.I., A.R.

471 and R.Z. performed the bioinformatics experiments, A.I., G.H and J.B.K. performed the electron  
472 microscopy imaging. All authors have read and approved the final manuscript.

473

#### 474 **FUNDING INFORMATION**

475 This work was supported by the French Government under the « Investissements d’avenir »  
476 (Investments for the Future) program managed by the Agence Nationale de la Recherche  
477 (ANR,fr: National Agency for Research), (reference: Méditerranée Infection 10-IAHU-03). This  
478 work was supported by Région Provence-Alpes-Côte d’Azur and European funding (FEDER  
479 (Fonds européen de développement régional) PRIMMI (Plateformes de Recherche et  
480 d’Innovation Mutualisées Méditerranée Infection)). In addition, collaborative research conducted  
481 by IHU Méditerranée Infection and the Hitachi High-Tech Corporation is funded by the Hitachi  
482 High-Tech Corporation.

483

#### 484 **CONFLICTS OF INTEREST**

485 Funding sources had no role in the design and conduct of the study, the collection, management,  
486 analysis, and interpretation of the data, nor in the preparation, review, or approval of the  
487 manuscript.

488 The authors would like to declare that Didier Raoult was a consultant in microbiology for the  
489 Hitachi High-Tech Corporation from March 2018 until March 2021. Personal fees to G.H. and  
490 J.B.K. were paid from a grant from the company Hitachi High-Tech Corporation. The remaining

491 authors declare that the research was conducted in the absence of any commercial or financial  
492 relationships that could be construed as a potential conflict of interest.

## 493 REFERENCES

- 494 1. Murugkar PP, Collins AJ, Chen T, Dewhirst FE. 2020. Isolation and cultivation of  
495 candidate phyla radiation Saccharibacteria (TM7) bacteria in coculture with bacterial  
496 hosts. *J Oral Microbiol* 12.
- 497 2. Bor B, Collins AJ, Murugkar PP, Balasubramanian S, To TT, Hendrickson EL, Bedree  
498 JK, Bidlack FB, Johnston CD, Shi W, McLean JS, He X, Dewhirst FE. 2020. Insights  
499 Obtained by Culturing Saccharibacteria With Their Bacterial Hosts. *J Dent Res* 99:685–  
500 694.
- 501 3. Raoult D. 2010. The post-Darwinist rhizome of life. *Lancet*. Lancet Publishing Group.
- 502 4. Ibrahim A, Colson P, Merhej V, Zgheib R, Maatouk M, Naud S, Bittar F, Raoult D. 2021.  
503 Rhizomal Reclassification of Living Organisms. *Int J Mol Sci* 22:5643.
- 504 5. Hug LA, Baker BJ, Anantharaman K, Brown CT, Probst AJ, Castelle CJ, Butterfield CN,  
505 HERNSDORF AW, Amano Y, Ise K, Suzuki Y, Dudek N, Relman DA, Finstad KM,  
506 Amundson R, Thomas BC, Banfield JF. 2016. A new view of the tree of life. *Nat*  
507 *Microbiol* 1:1–6.
- 508 6. He X, McLean JS, Edlund A, Yooseph S, Hall AP, Liu SY, Dorrestein PC, Esquenazi E,  
509 Hunter RC, Cheng G, Nelson KE, Lux R, Shi W. 2015. Cultivation of a human-associated  
510 TM7 phylotype reveals a reduced genome and epibiotic parasitic lifestyle. *Proc Natl Acad*  
511 *Sci U S A* 112:244–249.

- 512 7. Bor B, McLean JS, Foster KR, Cen L, To TT, Serrato-Guillen A, Dewhirst FE, Shi W, He  
513 X. 2018. Rapid evolution of decreased host susceptibility drives a stable relationship  
514 between ultrasmall parasite TM7x and its bacterial host. *Proc Natl Acad Sci U S A*  
515 115:12277–12282.
- 516 8. Brown CT, Hug LA, Thomas BC, Sharon I, Castelle CJ, Singh A, Wilkins MJ, Wrighton  
517 KC, Williams KH, Banfield JF. 2015. Unusual biology across a group comprising more  
518 than 15% of domain Bacteria. *Nature* 523:208–211.
- 519 9. Chen L-X, Al-Shayeb B, Méheust R, Li W-J, Doudna JA, Banfield JF. 2019. Candidate  
520 Phyla Radiation Roizmanbacteria From Hot Springs Have Novel and Unexpectedly  
521 Abundant CRISPR-Cas Systems. *Front Microbiol* 10:928.
- 522 10. Parks DH, Rinke C, Chuvochina M, Chaumeil PA, Woodcroft BJ, Evans PN, Hugenholtz  
523 P, Tyson GW. 2017. Recovery of nearly 8,000 metagenome-assembled genomes  
524 substantially expands the tree of life. *Nat Microbiol* 2:1533–1542.
- 525 11. Méheust R, Burstein D, Castelle CJ, Banfield JF. 2019. The distinction of CPR bacteria  
526 from other bacteria based on protein family content. *Nat Commun* 10:1–12.
- 527 12. Castelle CJ, Brown CT, Anantharaman K, Probst AJ, Huang RH, Banfield JF. 2018.  
528 Biosynthetic capacity, metabolic variety and unusual biology in the CPR and DPANN  
529 radiations. *Nat Rev Microbiol* 16:629–645.
- 530 13. Luef B, Frischkorn KR, Wrighton KC, Holman HYN, Birarda G, Thomas BC, Singh A,  
531 Williams KH, Siegerist CE, Tringe SG, Downing KH, Comolli LR, Banfield JF. 2015.  
532 Diverse uncultivated ultra-small bacterial cells in groundwater. *Nat Commun* 6.



- 533 14. Wrighton KC, Castelle CJ, Varaljay VA, Satagopan S, Brown CT, Wilkins MJ, Thomas  
534 BC, Sharon I, Williams KH, Tabita FR, Banfield JF. 2016. RubisCO of a nucleoside  
535 pathway known from Archaea is found in diverse uncultivated phyla in bacteria. *ISME J*  
536 10:2702–2714.
- 537 15. Tian R, Ning D, He Z, Zhang P, Spencer SJ, Gao S, Shi W, Wu L, Zhang Y, Yang Y,  
538 Adams BG, Rocha AM, Detienne BL, Lowe KA, Joyner DC, Klingeman DM, Arkin AP,  
539 Fields MW, Hazen TC, Stahl DA, Alm EJ, Zhou J. 2020. Small and mighty: Adaptation of  
540 superphylum Patescibacteria to groundwater environment drives their genome simplicity.  
541 *Microbiome* 8:51.
- 542 16. Bernard C, Lannes R, Li Y, Bapteste É, Lopez P. 2020. Rich Repertoire of Quorum  
543 Sensing Protein Coding Sequences in CPR and DPANN Associated with Interspecies and  
544 Interkingdom Communication. *mSystems* 5.
- 545 17. Bor B, Bedree JK, Shi W, McLean JS, He X. 2019. Saccharibacteria (TM7) in the Human  
546 Oral Microbiome. *J Dent Res*. SAGE Publications Inc.
- 547 18. Jaffe AL, He C, Keren R, Valentin-Alvarado LE, Munk P, Farag IF, Amano Y, Sachdeva  
548 R, West PT, Banfield JF. Patterns of gene content and co-occurrence constrain the  
549 evolutionary path 2 toward animal association in CPR bacteria  
550 <https://doi.org/10.1101/2021.03.03.433784>.
- 551 19. Perner M, Seifert R, Weber S, Koschinsky A, Schmidt K, Strauss H, Peters M, Haase K,  
552 Imhoff JF. 2007. Microbial CO<sub>2</sub> fixation and sulfur cycling associated with low-  
553 temperature emissions at the Lilliput hydrothermal field, southern Mid-Atlantic Ridge  
554 (9°S). *Environ Microbiol* 9:1186–1201.

- 555 20. Ferrari B, Winsley T, Ji M, Neilan B. 2014. Insights into the distribution and abundance of  
556 the ubiquitous candidatus Saccharibacteria phylum following tag pyrosequencing. *Sci Rep*  
557 4.
- 558 21. Fettweis JM, Serrano MG, Brooks JP, Edwards DJ, Girerd PH, Parikh HI, Huang B,  
559 Arodz TJ, Edupuganti L, Glascock AL, Xu J, Jimenez NR, Vivadelli SC, Fong SS, Sheth  
560 NU, Jean S, Lee V, Bokhari YA, Lara AM, Mistry SD, Duckworth RA, Bradley SP,  
561 Koparde VN, Orenda XV, Milton SH, Rozycki SK, Matveyev A V., Wright ML,  
562 Huzurbazar S V., Jackson EM, Smirnova E, Korlach J, Tsai YC, Dickinson MR, Brooks  
563 JL, Drake JI, Chaffin DO, Sexton AL, Gravett MG, Rubens CE, Wijesooriya NR,  
564 Hendricks-Muñoz KD, Jefferson KK, Strauss JF, Buck GA. 2019. The vaginal  
565 microbiome and preterm birth. *Nat Med* 25:1012–1021.
- 566 22. Dewhirst FE, Chen T, Izard J, Paster BJ, Tanner ACR, Yu WH, Lakshmanan A, Wade  
567 WG. 2010. The human oral microbiome. *J Bacteriol* 192:5002–5017.
- 568 23. Coker MO, Mongodin EF, El-Kamary SS, Akhigbe P, Obuekwe O, Omoigberale A,  
569 Langenberg P, Enwonwu C, Hittle L, Blattner WA, Charurat M. 2020. Immune status, and  
570 not HIV infection or exposure, drives the development of the oral microbiota. *Sci Rep* 10.
- 571 24. Cross KL, Campbell JH, Balachandran M, Campbell AG, Cooper SJ, Griffen A, Heaton  
572 M, Joshi S, Klingeman D, Leys E, Yang Z, Parks JM, Podar M. 2019. Targeted isolation  
573 and cultivation of uncultivated bacteria by reverse genomics. *Nat Biotechnol* 37:1314–  
574 1321.
- 575 25. Maatouk M, Ibrahim A, Rolain J-M, Merhej V, Bittar F. 2021. Small and equipped: the  
576 rich repertoire of antibiotic resistance genes in Candidate Phyla Radiation genomes.

- 577 bioRxiv 2021.07.02.450847.
- 578 26. Camanocha A, Dewhirst FE. 2014. Host-associated bacterial taxa from Chlorobi,  
579 Chloroflexi, GN02, Synergistetes, SR1, TM7, and WPS-2 Phyla/candidate divisions. *J*  
580 *Oral Microbiol* 6.
- 581 27. McLean JS, Bor B, Kerns KA, Liu Q, To TT, Solden L, Hendrickson EL, Wrighton K, Shi  
582 W, He X. 2020. Acquisition and Adaptation of Ultra-small Parasitic Reduced Genome  
583 Bacteria to Mammalian Hosts. *Cell Rep* 32:107939.
- 584 28. Takenaka R, Aoi Y, Ozaki N, Ohashi A, Kindaichi T. 2018. Specificities and efficiencies  
585 of primers targeting Candidatus phylum Saccharibacteria in activated sludge. *Materials*  
586 (Basel) 11:1129.
- 587 29. Nakai R. 2020. Size matters: Ultra-small and filterable microorganisms in the  
588 environment. *Microbes Environ. Japanese Society of Microbial Ecology*.
- 589 30. Levasseur A, Merhej V, Baptiste E, Sharma V, Pontarotti P, Raoult D. 2017. The rhizome  
590 of lokiarchaeota illustrates the mosaicity of archaeal genomes. *Genome Biol Evol* 9:2635–  
591 2639.
- 592 31. Chelkha N, Hasni I, Louazani AC, Levasseur A, Scola B La. *Vermamoeba vermiformis*  
593 CDC-19 draft genome sequence reveals considerable gene trafficking including with  
594 candidate phyla radiation and giant viruses <https://doi.org/10.1038/s41598-020-62836-9>.
- 595 32. Ibrahim A, Baron SA, Yousfi H, Hadjadj L, Lalaoui R, Morand S, Rolain JM, Bittar F.  
596 2021. Development and standardization of a specific real-time PCR assay for the rapid  
597 detection of *Candida auris*. *Eur J Clin Microbiol Infect Dis* 1–5.

- 598 33. Sizova M V., Doerfert SN, Gavrish E, Epstein SS. 2015. TM7 detection in human  
599 microbiome: Are PCR primers and FISH probes specific enough? *J Microbiol Methods*  
600 114:51–53.
- 601 34. Bankevich A, Nurk S, Antipov D, Gurevich AA, Dvorkin M, Kulikov AS, Lesin VM,  
602 Nikolenko SI, Pham S, Prjibelski AD, Pyshkin A V., Sirotkin A V., Vyahhi N, Tesler G,  
603 Alekseyev MA, Pevzner PA. 2012. SPAdes: A new genome assembly algorithm and its  
604 applications to single-cell sequencing. *J Comput Biol* 19:455–477.
- 605 35. Seemann T. 2014. Prokka: Rapid prokaryotic genome annotation. *Bioinformatics*  
606 30:2068–2069.
- 607 36. Chan PP, Lowe TM. 2019. tRNAscan-SE: Searching for tRNA genes in genomic  
608 sequences, p. 1–14. *In Methods in Molecular Biology*. Humana Press Inc.
- 609 37. Morand A, Tall ML, Kuete Yimagou E, Ngom II, Lo CI, Cornu F, Tsimaratos M, Lagier  
610 JC, Levasseur A, Raoult D, Fournier PE. 2021. *Anaerococcus urinimassiliensis* sp. nov., a  
611 new bacterium isolated from human urine. *Sci Rep* 11.
- 612 38. Gupta SK, Padmanabhan BR, Diene SM, Lopez-Rojas R, Kempf M, Landraud L, Rolain  
613 JM. 2014. ARG-annot, a new bioinformatic tool to discover antibiotic resistance genes in  
614 bacterial genomes. *Antimicrob Agents Chemother* 58:212–220.
- 615 39. Fritz S, Rajaonison A, Chabrol O, Raoult D, Rolain JM, Merhej V. 2018. Full-length title:  
616 NRPPUR database search and in vitro analysis identify an NRPS-PKS biosynthetic gene  
617 cluster with a potential antibiotic effect. *BMC Bioinformatics* 19.
- 618 40. Siguier P, Perochon J, Lestrade L, Mahillon J, Chandler M. 2006. ISfinder: the reference

- 619 centre for bacterial insertion sequences. *Nucleic Acids Res* 34.
- 620 41. Abby SS, Cury J, Guglielmini J, Néron B, Touchon M, Rocha EPC. 2016. Identification  
621 of protein secretion systems in bacterial genomes. *Sci Rep* 6:1–14.
- 622 42. Sullivan MJ, Petty NK, Beatson SA. 2011. Easyfig: A genome comparison visualizer.  
623 *Bioinformatics* 27:1009–1010.
- 624 43. Colson P, Levasseur A, Scola B La, Sharma V, Nasir A, Pontarotti P, Caetano-Anollés G,  
625 Raoult D. 2018. Ancestrality and mosaicism of giant viruses supporting the definition of  
626 the fourth TRUC of microbes. *Front Microbiol* 9:2668.
- 627 44. Krzywinski M, Schein J, Birol I, Connors J, Gascoyne R, Horsman D, Jones SJ, Marra  
628 MA. 2009. Circos: An information aesthetic for comparative genomics. *Genome Res*  
629 19:1639–1645.
- 630 45. Abou Abdallah R, Bou Khalil J, Andrieu C, Tomeï E, Armstrong N, Fournier PE, Raoult  
631 D, Bittar F. 2019. Draft genome and description of *Cohnella massiliensis* sp. nov., a new  
632 bacterial species isolated from the blood culture of a hemodialysis patient. *Arch Microbiol*  
633 201:305–312.
- 634
- 635
- 636
- 637
- 638
- 639
- 640
- 641

642 **Figure 1:** Summary of the *Saccharibacteria* co-culture protocol used in this study.

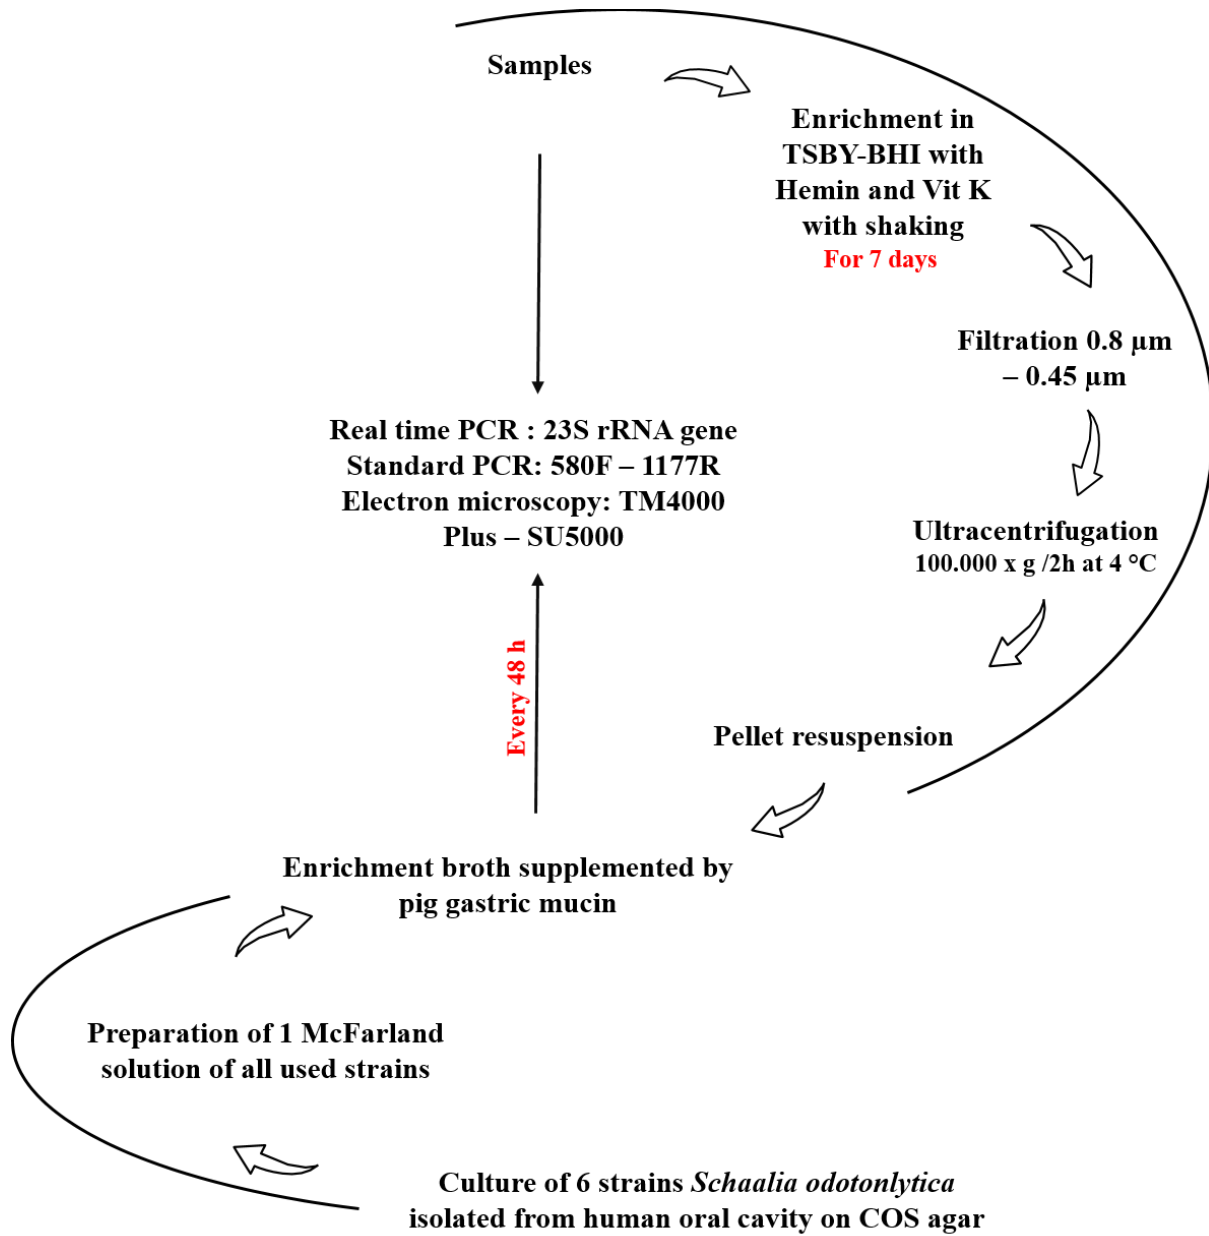

643

644

645 **Figure 2:** Graphic representation showing the Ct variation between each condition tested in this  
 646 study. The co-culture of first sample with *Schaalia odontolytica* is represented in red, and the  
 647 second is represented in green. For the co-culture with *Streptomyces* strains, the anaerobic  
 648 conditions are indicated in blue and the aerobic condition in yellow.

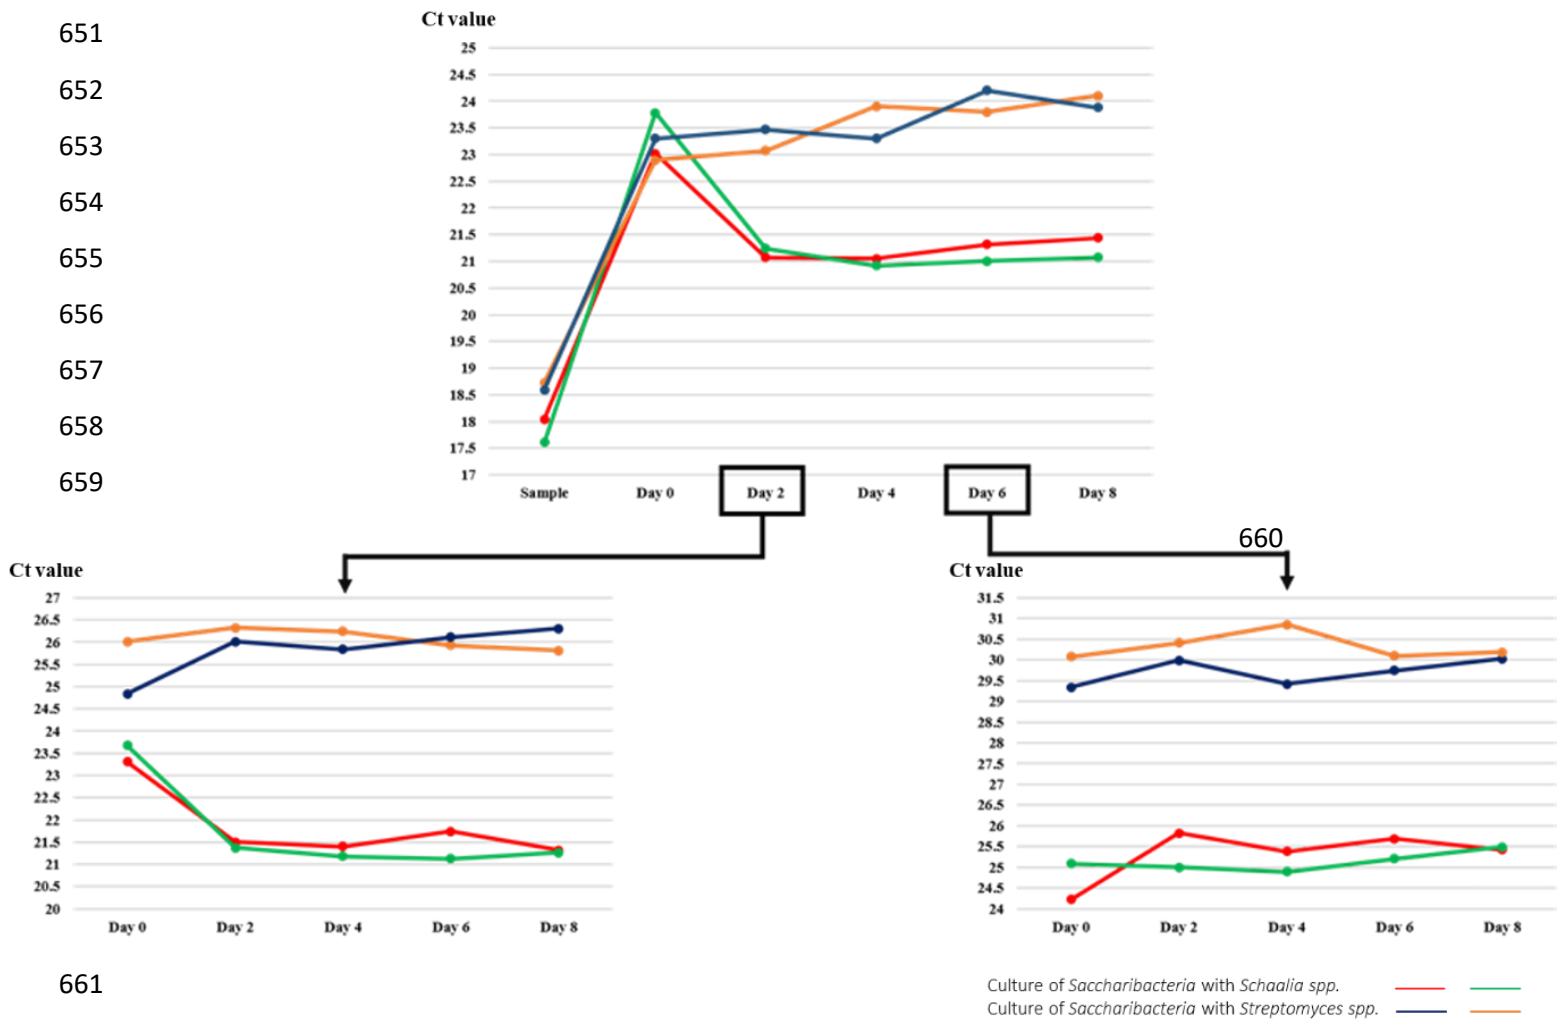

662 **Figure 3:** (a) Electron microscopy micrographs showing the presence of *Saccharibacteria* in the  
663 samples tested, (b) the *Saccharibacteria* cells detached from their host after filtration, (c) the  
664 physical association between purified *Saccharibacteria* cells with their new host (*Schaalia*  
665 *odontolytica*) using Hitachi – SU5000 and (d) using Hitachi TM4000 Plus.

666

667

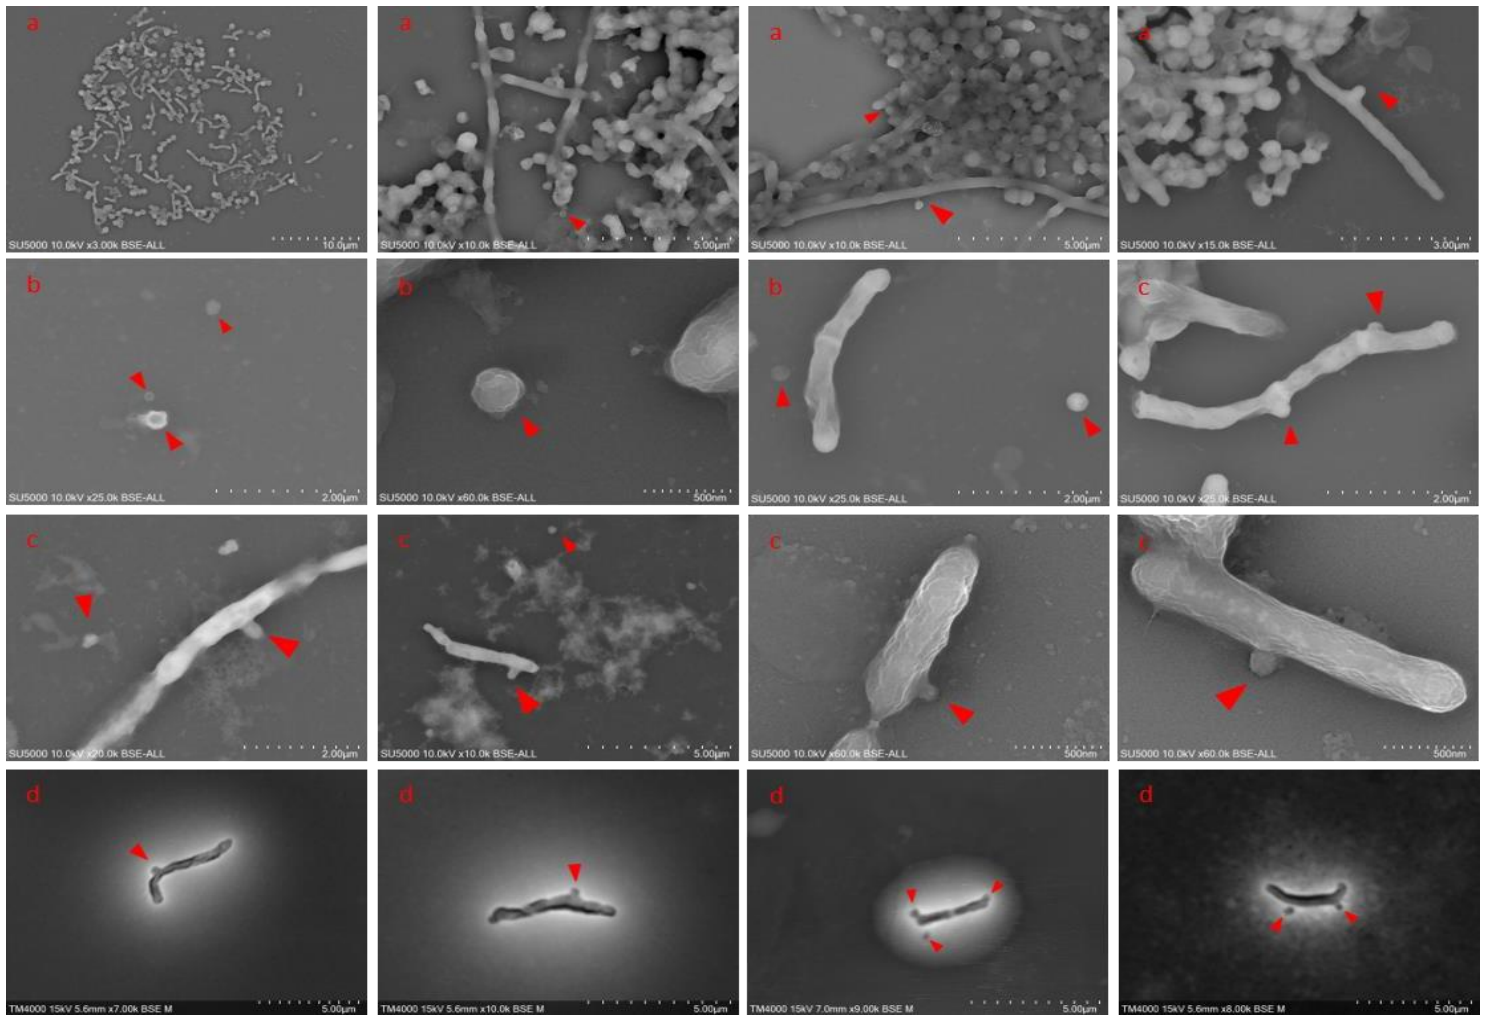

668

669



670 **Figure 4:** (a) Graphic representation showing the genomic comparison between *Candidatus*  
671 *Minimicrobia vallesae*, (b) the TM7x reference genome and (c) and *Candidatus* *Minimicrobia*  
672 *naudis*. This representation was generated using the Easyfig v 2.2.5 online tool.

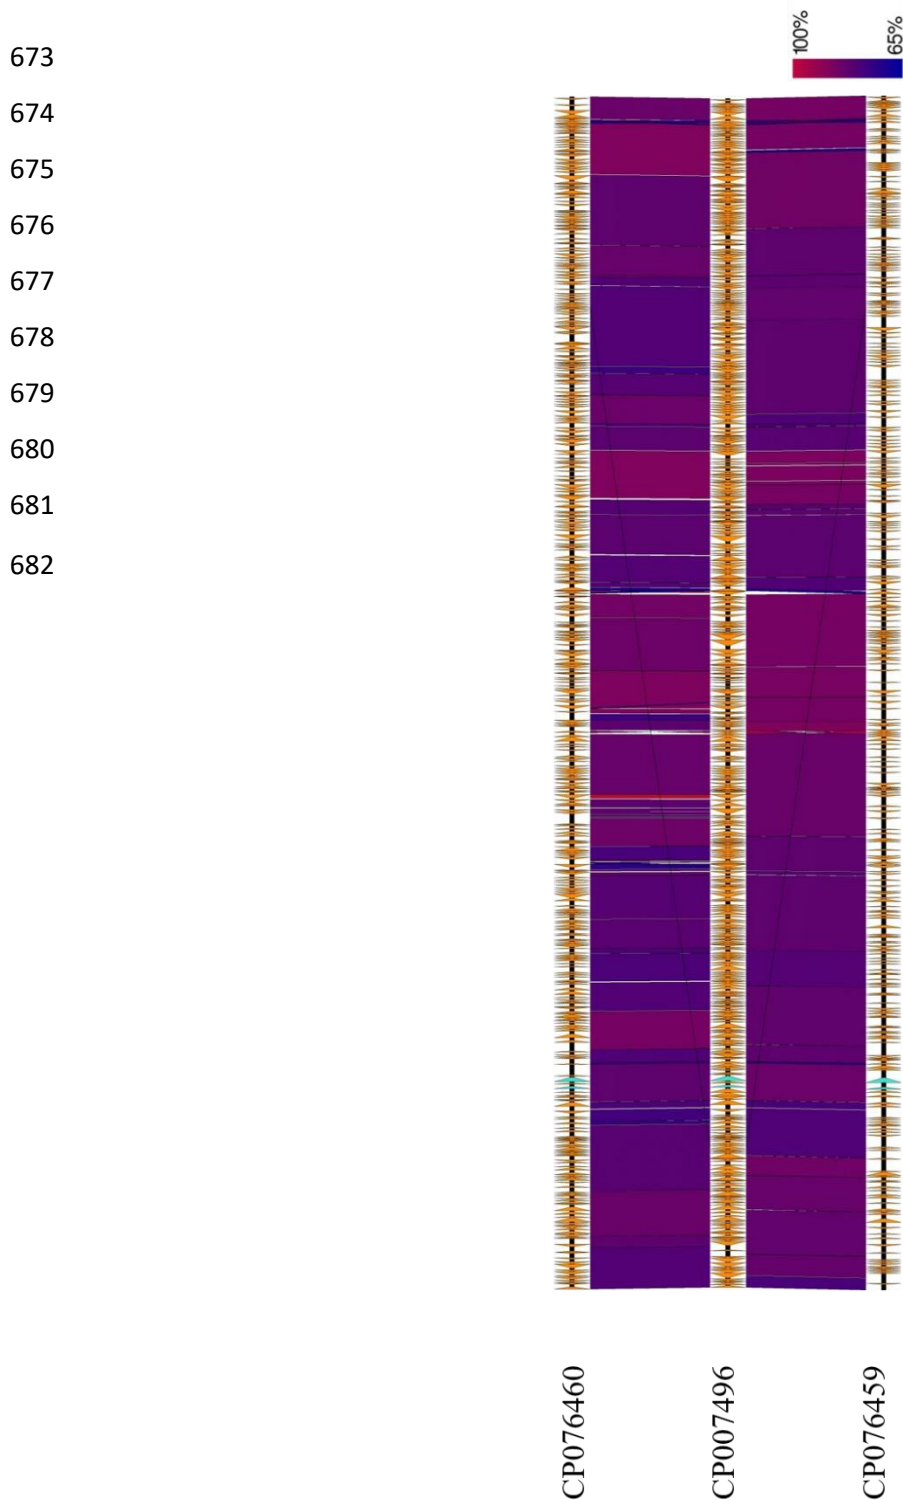

683 **Figure 5:** Two-dimensional representation of tRNA with intronic sequences, detected in each  
684 genome.

685

686

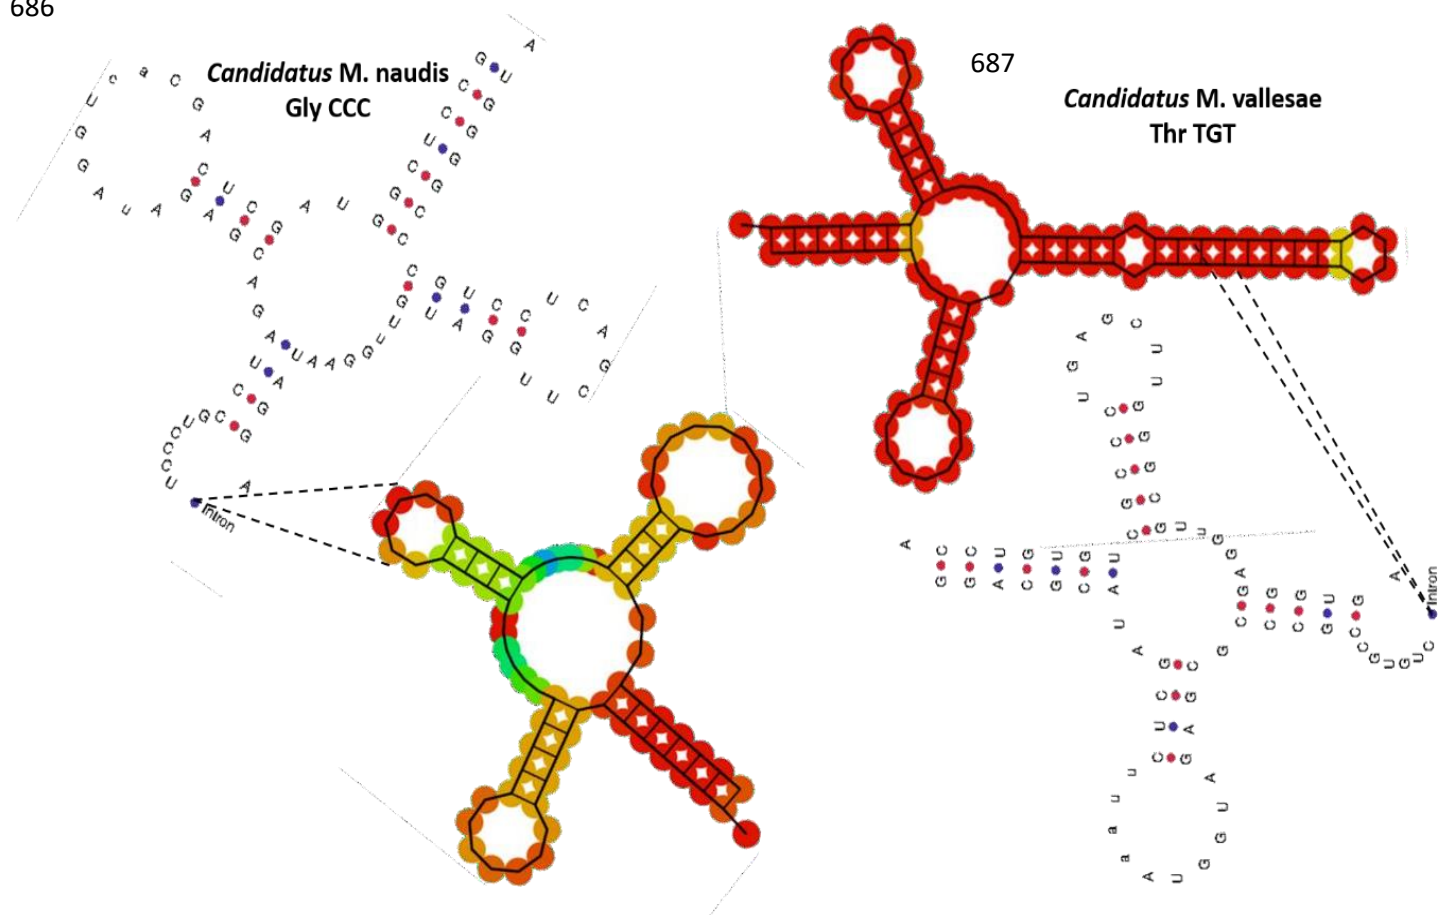

688 **Figure 6:** Unrooted phylogenetic tree shows the analyses of the 16S ribosomal RNA gene of all  
689 available *Saccharibacteria* complete genomes (marked in blue), *Candidatus Minimicrobia naudis*  
690 (marked in red), *Candidatus Minimicrobia vallesae* (marked in red) and all available non-  
691 *Saccharibacteria* CPR complete genomes (marked in green). This tree was generated using  
692 MegaX.

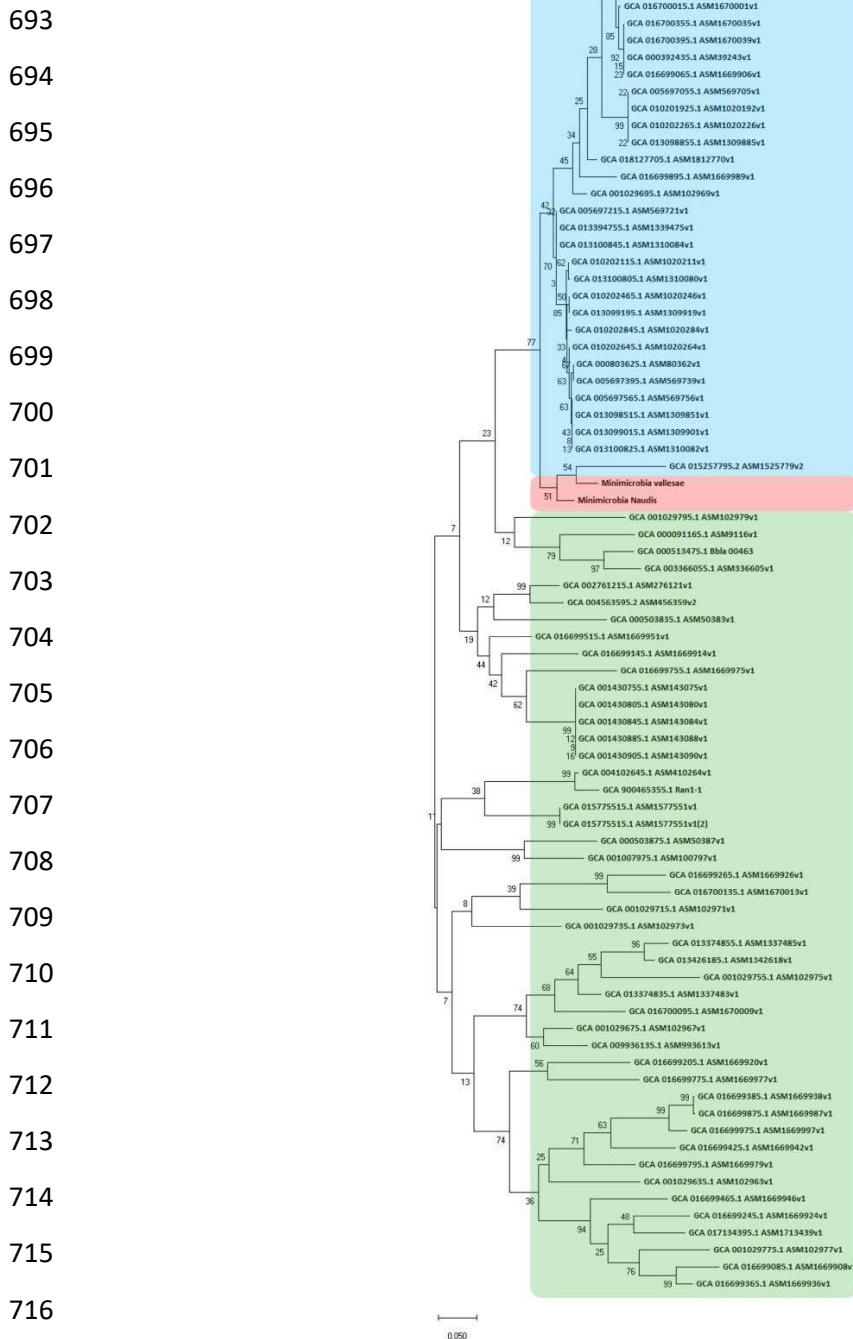

717 **Figure 7:** Rhizomal illustration presenting the mosaicism of each used genome: (a) *Candidatus*  
718 *Minimicrobia naudis*, (c) *Candidatus* *Minimicrobia vallesae* and (b) TM7x reference genomes.  
719 Each protein encoding gene is represented by a curve, coloured according to its origin: bacterial  
720 origin in red, CPR non-*Saccharibacteria* phylum origin in dark green, *Saccharibacteria* phylum  
721 origin in light-green, Eukaryotic origin in yellow, archaeal origin in dark-blue, and ORFans in  
722 grey. In the first line, each curve represents a protein encoding gene, arranged in the figure by  
723 order. For the second line, protein encoding genes belonging to the same origin are arranged  
724 together. Figures were performed using the circos tool

725

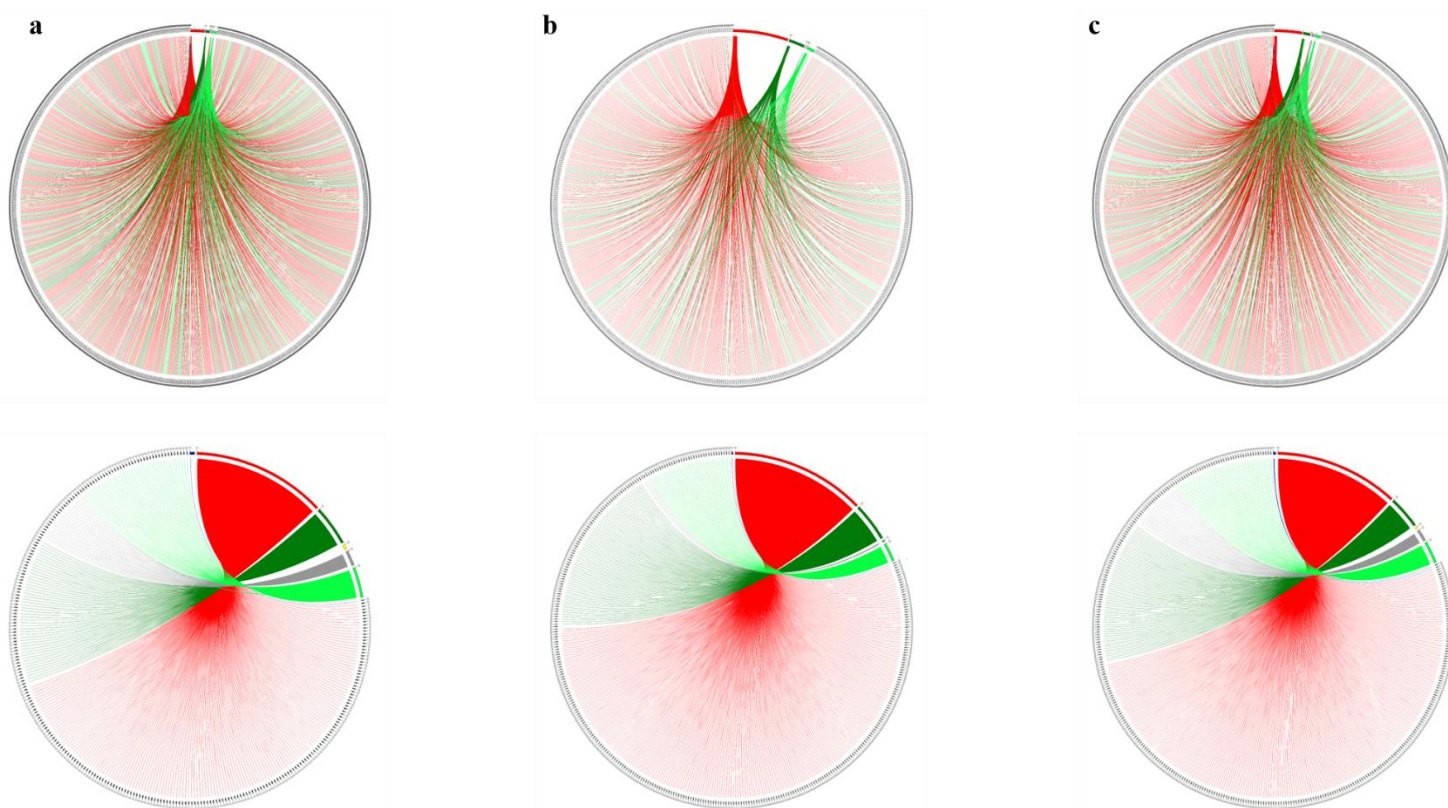

726

727

728 **SUPPLEMENTAL MATERIAL**

729 **Figure S1:** Graphic representation showing the distribution of functional classes of predicted  
730 genes according to the clusters of orthologous groups (COGs) of proteins of *Candidatus*  
731 *Minimicrobia naudis* and *Candidatus* *Minimicrobia vallesae*, among other *Saccharibacteria*  
732 complete genomes.

733 **Figure S2:** Graphic circular map of *Candidatus* *Minimicrobia naudis* and *Candidatus*  
734 *Minimicrobia vallesae* complete genomes. Maps were generating using the CG view online tool.

735 **Figure S3:** Heat map generated with OrthoANI values calculated using the OAT software  
736 between *Candidatus* *Minimicrobia naudis* and *Candidatus* *Minimicrobia vallesae* and all CPR  
737 complete genomes available on NCBI at 1 June 2021.

738 **Table S1:** Genomic characteristics of *Candidatus* *Minimicrobia naudis* and *Candidatus*  
739 *Minimicrobia vallesae*.

740 **Table S2:** Distribution of functional classes of predicted genes according to the clusters of  
741 orthologous groups (COGs) of proteins of *Candidatus* *Minimicrobia naudis* and *Candidatus*  
742 *Minimicrobia vallesae*, among other *Saccharibacteria* complete genomes.

743
